Anesthesiology  
51:477, 1979

## Anesthesiologists are CPR Experts!

*To the Editor:*—The answer to Dr. Garman's editorial<sup>1</sup> question, "Are anesthesiologists experts in cardiopulmonary resuscitation?" is YES. Dr. Garman concludes, unjustifiably from the study by Schwartz *et al.*,<sup>2</sup> that anesthesiologists are not well trained in current CPR practices because, . . . "the majority failed the didactic test." The American Heart Association's CPR course is a "cookbook" attempt to provide the public with a rote method of CPR, since the public has no background to do otherwise. The language of the test and the questions (*e.g.*, where is the heart located) verify the thrust of this program. In fact, it is demeaning to ask professionals whose entire training is based on the maintenance and restoration of cellular oxygenation to take this test.

Further, the study by Schwartz *et al.* may contain several flaws. First, they did not correct for the funning and fooling factor, which is an attitudinal response to a test held in low regard. Second, the answers to some of the questions asked of test participants would be considered incorrect or immaterial by anesthesiologists. Finally, it is naive to attempt to make something cerebral out of the basic CPR course, because, after one remembers the recommended breathing-compression ratio, then all it takes is stamina (and a lot of people do not have it).

Those of us who have been involved in CPR for years know the immense number of variables in each resuscitation (the manikin has its), and that a rigid approach should not be applied to professionals such as anesthesiologists. The intent of the American Heart Association CPR program was for mass public education and, in that regard, it has done exceedingly well. On the other hand, the dedicated CPR instructors should not wrongly indict an entire specialty in order to add credibility to their good work.

HERMAN L. ALLEN, M.D.  
*Associate Professor of Anesthesia*  
*Department of Anesthesiology*  
*Northeastern Ohio Universities*  
*College of Medicine*  
*and*  
*The Youngstown Hospital Association*  
*Youngstown, Ohio 44501*

### REFERENCES

1. Garman JK: Are anesthesiologists experts in cardiopulmonary resuscitation? *ANESTHESIOLOGY* 50:182-184, 1979
2. Schwartz AJ, Orkin FK, Ellison N: Anesthesiologists' training and knowledge of basic life support. *ANESTHESIOLOGY* 50:191-194, 1979

(Accepted for publication May 29, 1979.)

Anesthesiology  
51:477-478, 1979

*In reply:*—My rebuttle to Dr. Allen's letter will be brief—my editorial speaks for itself. It is unfortunate that Dr. Allen feels threatened by the facts. First of all—my conclusion that the majority of anesthesiologists are, in fact, not experts in cardiopulmonary resuscitation is derived not only from their "failure of a didactic test" but more importantly, from the fact that they consistently fail skills tests. In other words, many anesthesiologists have allowed their knowledge and psychomotor skills of basic and advanced CPR to become outdated. This applies not only to the physical performance of CPR but also to the adjunctive skills such as interpretation of arrhythmias and drug

therapy. Second, a careful reading of the current 50-question American Heart Association Basic Cardiac Life Support Test fails to find any question which reads "Where is the heart located." To the contrary, it is a well-designed test written by professionals, which certainly is not demeaning to any group. Third, if Dr. Allen would read the paper by McIntyre *et al.*,<sup>1</sup> he would see that much more than "stamina" is required to do good basic CPR (in fact, if you do it right it doesn't take much stamina!). Last, the intent of the American Heart Association CPR program is not only to educate the lay public but also to train medical and allied health personnel. If Dr. Allen really wants to
